# Supplementary material
Source: ML conference proceedings conference paper supplement (https://proceedings.neurips.cc/paper_files/paper/2022/hash/5692c7dbc4abcaa50f9ce609819212e5-Abstract.html)
Supplement: Supplementary file 1 [file 5692c7dbc4abcaa50f9ce609819212e5-Supplemental-Conference.pdf]

## A Existence of Fair Solutions

**Theorem 4.1.** *For any robustness guarantee  $\epsilon > 0$ , an SEF and feasible adjustment scheme always exists<sup>2</sup>*

*Proof.* The idea is to penalize actions off the target policy by a sufficiently large value. We construct an adjustment scheme  $(\delta_i)_{i \in [n]}$  where

$$\delta_i(s, a) = \begin{cases} 0, & \text{if } a = \pi^*(s) \\ -\max_{i' \in [n]} \frac{2h}{1-\gamma_{i'}} - \epsilon, & \text{otherwise} \end{cases}$$

for all  $s \in S$  and  $i \in [n]$ . The scheme is SEF as  $\delta_i$  is the same for all the agents.

To see that it is also feasible, observe that by following the target policy  $\pi^*$ , an agent obtains reward at least  $-h$  in every step. Hence, for all  $s \in S$  and all  $a \neq \pi^*(s)$ , we have

$$Q_i^{\pi^*}(s, \pi^*(s) \mid \delta_i) \geq -\frac{h}{1-\gamma_i} \geq -\max_{i' \in [n]} \frac{h}{1-\gamma_{i'}}.$$

It then follows that

$$\begin{aligned} Q_i^{\pi^*}(s, \pi^*(s) \mid \delta_i) &\geq \delta_i(s, a) + \frac{h}{1-\gamma_i} + \epsilon \\ &\geq \delta_i(s, a) + \gamma_i \cdot \sum_{s' \in S} P(s, a, s') \cdot V_i^{\pi^*}(s' \mid \delta_i) + \epsilon \\ &= Q_i^{\pi^*}(s, a \mid \delta_i) + \epsilon, \end{aligned}$$

where we used the fact that  $V_i^{\pi^*}(s' \mid \delta_i) \leq \frac{h}{1-\gamma_i}$  for all  $s'$ , which is due to the fact that the reward obtained at every step is at most  $h$ .  $\square$

**Theorem 4.3.** *When the agents have the same discount factor, a feasible adjustment scheme that is also SEF and non-negative always exists, for any robustness guarantee  $\epsilon > 0$ .*

*Proof.* Suppose that  $\gamma_1 = \dots = \gamma_n = \gamma$ . Let  $H = \frac{2}{1-\gamma} \cdot h + \epsilon$ . We construct the following scheme  $\delta = (\delta_i)_{i \in [n]}$ :

$$\delta_i(s, a) = \begin{cases} H + \frac{\gamma}{1-\gamma} \cdot H \cdot \sum_{s' \in S^T} P(s, a, s'), & \text{if } a = \pi^*(s) \\ 0, & \text{otherwise} \end{cases} \quad (17)$$

for all  $s \in S$  and  $i \in [n]$ , where  $S^T$  denotes the set of terminal states in  $S$ . The scheme is obviously non-negative and SEF. We show that it is also feasible.

Consider an arbitrary agent  $i$ . We first argue that  $V_i^{\pi^*}(s \mid \delta_i) \in \left[\frac{H-h}{1-\gamma}, \frac{H+h}{1-\gamma}\right]$  for all  $s \in S \setminus S^T$ . Indeed, if the original reward function  $R_i$  was a zero function ( $R_i(s, a) = 0$ ), it can be easily verified that the solution to the Bellman equation would be:  $V_i^{\pi^*}(s \mid \delta_i) = \frac{H}{1-\gamma}$  for all  $s \in S \setminus S^T$  and  $V_i^{\pi^*}(s \mid \delta_i) = 0$  for all  $s \in S^T$ . Now the original reward  $R_i(s, a)$  is bounded in  $[-h, h]$ , which means an additional reward in this range in each step and, hence, an additional cumulative reward in the interval  $\left[\frac{-h}{1-\gamma}, \frac{h}{1-\gamma}\right]$ . Adding this to  $\frac{H}{1-\gamma}$  gives the desired range  $\left[\frac{H-h}{1-\gamma}, \frac{H+h}{1-\gamma}\right]$ .

Hence,  $V_i^{\pi^*}(s \mid \delta_i) \in \left[\frac{H-h}{1-\gamma}, \frac{H+h}{1-\gamma}\right]$  for all  $s \in S$ . This further implies that, for any actions  $a, b \in A$ , it holds that

$$\sum_{s' \in S} P(s, a, s') \cdot V_i^{\pi^*}(s' \mid \delta_i) \geq \sum_{s' \in S} P(s, b, s') \cdot V_i^{\pi^*}(s' \mid \delta_i) - \frac{2h}{1-\gamma}. \quad (18)$$

---

<sup>2</sup>Full proofs and omitted proofs can all be found in the appendix.

We have

$$\begin{aligned}
Q_i^{\pi^*}(s, \pi^*(s) \mid \delta_i) &= R_i(s, \pi^*(s)) + \delta_i(s, \pi^*(s)) + \gamma \cdot \sum_{s' \in S} P(s, \pi^*(s), s') \cdot V_i^{\pi^*}(s' \mid \delta_i) \\
&\geq -h + H + \gamma \cdot \sum_{s' \in S} P(s, \pi^*(s), s') \cdot V_i^{\pi^*}(s' \mid \delta_i) \\
&\geq h + \epsilon + \gamma \cdot \sum_{s' \in S} P(s, a, s') \cdot V_i^{\pi^*}(s' \mid \delta_i)
\end{aligned}$$

for any  $a \in A$ , where the last line follows by (18) and the fact that  $H = \frac{2\gamma}{1-\gamma} \cdot h + 2h + \epsilon$ . By definition, we have  $\delta_i(s, a) = 0$  for all  $a \neq \pi^*(s)$ . It follows that

$$\begin{aligned}
Q_i^{\pi^*}(s, \pi^*(s) \mid \delta_i) &\geq R_i(s, a) + \delta_i(s, a) + \gamma \cdot \sum_{s' \in S} P(s, a, s') \cdot V_i^{\pi^*}(s' \mid \delta_i) + \epsilon \\
&= Q_i^{\pi^*}(s, a \mid \delta_i) + \epsilon.
\end{aligned}$$

Therefore,  $\delta$  is a feasible scheme.  $\square$

## B PoF Bounds

We analyze PoWEF first, and then PoEF and PoSEF.

### B.1 PoWEF

To analyze the PoWEF, we first derive its lower bound.

**Lemma B.1.**  $\text{PoWEF}(n, m, \lambda) = \Omega(\lambda \cdot \sqrt{m})$ .

*Proof.* Consider the family of instances illustrated in Figure 3 and we consider the two-agent version of this example ( $n = 2$ ) that consists of only agents 1 and 2. We show that the PoWEF of this particular family of instances is  $\Omega(\lambda \cdot \sqrt{|S| \cdot |A|})$  to establish the lower bound of PoWEF.

First, the cost of teaching  $\pi^*$  without fairness constraints is at most 1. Indeed, without fairness constraints,  $\pi^*$  is already the optimal policy of agent 2 up to a robustness of  $\epsilon$ . As for agent 1, it suffices to set  $\delta_1(c) = 1$ . Hence, the total cost is 1.

Now consider the case with fairness constraints and suppose that  $\delta = (\delta_1, \delta_2)$  is a WEF and feasible adjustment scheme. We argue that  $\|\delta_1\| + \|\delta_2\| = \Omega(\lambda \cdot \sqrt{|S| \cdot |A|})$ .

By symmetry, we can assume without loss of generality that each  $\delta_i$  assigns the same reward for a state-action pair and its copies in the instance. Hence, in our analysis, it suffices to consider only the values associated with the original state-action pairs, which are representative of the values associated with their copies. Given this, we omit the state in the notation and write, e.g.,  $\delta_i(a) = \delta_i(s_l, a)$ , as each action is associated with a unique state.

Consider the following two cases:

**Case 1:**  $\delta_1(c) \leq 1/2$ . Since  $\delta_1$  incentivizes agent 1 to use the target policy  $\pi^*$ , we have  $Q_1^{\pi^*}(s_r, d) \geq Q_1^{\pi^*}(s_r, e) + \epsilon$ , or equivalently,

$$\delta_1(d) + \epsilon + \frac{\gamma}{1-\gamma} \cdot (\delta_1(c) - 1) \geq \delta_1(e) + \epsilon.$$

Rearranging the terms gives

$$\delta_1(e) - \delta_1(d) \leq \frac{\gamma}{1-\gamma} \cdot (\delta_1(c) - 1) \leq -\frac{1}{2} \cdot \frac{\gamma}{1-\gamma}.$$

Note that for any two real numbers  $x$  and  $y$ , we have  $x^2 + y^2 \geq \frac{(x-y)^2}{2}$ . Hence,

$$\begin{aligned}
\|\delta_1\| &\geq \sqrt{L} \cdot \sqrt{\delta_1^2(e) + \delta_1^2(d)} \geq \sqrt{L} \cdot \sqrt{\frac{(\delta_1(e) - \delta_1(d))^2}{2}} \\
&\geq \sqrt{L} \cdot \frac{1}{\sqrt{8}} \cdot \frac{\gamma}{1-\gamma} = \Omega(\lambda \cdot \sqrt{|S| \cdot |A|}).
\end{aligned}$$

**Case 2:**  $\delta_1(c) \geq 1/2$ . By WEF, we have  $\rho_1^{\pi^*}(\delta_1) \geq \rho_1^{\pi^*}(\delta_2)$  and  $\rho_2^{\pi^*}(\delta_2) \geq \rho_2^{\pi^*}(\delta_1)$ . Let  $\varrho_i^{\pi^*}(\delta_j) = \rho_i^{\pi^*}(\delta_j) - \rho_i^{\pi^*}(0)$ , where  $\rho_i^{\pi^*}(0)$  denotes the agent's cumulative reward without any adjustment. Since now both agents 1 and 2 have the same discount factor  $\gamma$ , we have

$$\varrho_1^{\pi^*}(\delta_j) = \varrho_2^{\pi^*}(\delta_j)$$

for any  $j$ . Hence,

$$\begin{aligned} \rho_1^{\pi^*}(\delta_1) \geq \rho_1^{\pi^*}(\delta_2) &\implies \varrho_1^{\pi^*}(\delta_1) \geq \varrho_1^{\pi^*}(\delta_2) = \varrho_2^{\pi^*}(\delta_2), \\ \text{and } \rho_2^{\pi^*}(\delta_2) \geq \rho_2^{\pi^*}(\delta_1) &\implies \varrho_2^{\pi^*}(\delta_2) \geq \varrho_2^{\pi^*}(\delta_1) = \varrho_1^{\pi^*}(\delta_1), \end{aligned}$$

which means that  $\varrho_1^{\pi^*}(\delta_1) = \varrho_2^{\pi^*}(\delta_2)$ . Expanding this gives

$$\delta_1(a) + \left( \delta_1(d) + \frac{\gamma}{1-\gamma} \cdot \delta_1(c) \right) = \delta_2(a) + \left( \delta_2(d) + \frac{\gamma}{1-\gamma} \cdot \delta_2(c) \right). \quad (19)$$

Moreover,  $\delta_2$  incentivizes agent 2 to use the target policy  $\pi^*$ , so we have  $Q_2^{\pi^*}(s_l, a) \geq Q_2^{\pi^*}(s_l, b) + \epsilon$ , expanding which gives

$$\delta_2(a) + \epsilon \geq \delta_2(b) + \frac{\gamma}{1-\gamma} \cdot \delta_2(c) + \epsilon.$$

Combining (19) with the above equation gives

$$2 \cdot \delta_2(a) - \delta_2(b) + \delta_2(d) - \delta_1(a) - \delta_1(d) \geq \frac{\gamma}{1-\gamma} \cdot \delta_1(c) \geq \frac{1}{2} \cdot \frac{\gamma}{1-\gamma}.$$

Note that for any real numbers  $x_1, \dots, x_k$  and nonzero coefficients  $a_1, \dots, a_k$ , we have  $\sum_{i=1}^k x_i^2 \geq \left( \sum_{i=1}^k a_i \cdot x_i \right)^2 / \sum_{i=1}^k a_i^2$ . It follows that

$$\begin{aligned} \|\delta_1\| + \|\delta_2\| &\geq \sqrt{L} \cdot \sqrt{\delta_2^2(a) + \delta_2^2(b) + \delta_2^2(d) + \delta_1^2(a) + \delta_1^2(d)} \\ &\geq \sqrt{L} \cdot \frac{1}{\sqrt{32}} \cdot \frac{\gamma}{1-\gamma} \\ &= \Omega(\lambda \cdot \sqrt{|S| \cdot |A|}). \end{aligned}$$

Therefore, in both cases, we have  $\|\delta_1\| + \|\delta_2\| = \Omega(\lambda \cdot \sqrt{|S| \cdot |A|})$ , which completes the proof.  $\square$

**Lemma B.2.**  $\text{PoWEF}(n, m, \lambda) = O(\lambda \cdot \sqrt{m})$ .

*Proof.* Suppose that without the fairness constraints the minimum costs for teaching  $\pi^*$  is  $C_i$  for each agent  $i \in [n]$ ; let  $\hat{\delta}_i$  be the adjustment achieving this minimum cost for each  $i \in [n]$ , and let  $\hat{\delta} = \left( \hat{\delta}_i \right)_{i \in [n]}$ . Hence,  $|\hat{\delta}_i(s, a)| \leq \|\hat{\delta}_i\| = C_i$  for all  $i, s$ , and  $a$ .

We construct the following adjustment scheme  $\delta = (\delta_i)_{i \in [n]}$  in an approach similar to that in the proof of Theorem 4.1. We let

$$\delta_i(s, a) = \begin{cases} 0, & \text{if } a = \pi^*(s) \\ -\frac{2}{1-\gamma_i} \cdot C_i, & \text{otherwise} \end{cases} \quad (20)$$

for all  $s \in S$  and  $i \in [n]$ . With this  $\delta$ , we have

$$\frac{\|\delta_i\|}{\|\hat{\delta}_i\|} = \frac{\sqrt{\sum_{s \in S, a \in A} (\delta_i(s, a))^2}}{C_i} \leq \frac{\sqrt{|S| \cdot |A|} \cdot \frac{2}{1-\gamma_i} \cdot C_i}{C_i} = 2\lambda \cdot \sqrt{|S| \cdot |A|}. \quad (21)$$

Hence, the price of using  $\delta$  is

$$\frac{\sum_{i \in [n]} \|\delta_i\|}{\sum_{i \in [n]} \|\hat{\delta}_i\|} \leq 2\lambda \cdot \sqrt{|S| \cdot |A|} = O\left(\lambda \cdot \sqrt{|S| \cdot |A|}\right).$$

Therefore, it remains to argue that  $\delta$  is feasible and WEF.

**Feasibility** Compare the differences in the V-values when  $\widehat{\delta}$  and  $\delta$  are applied. Since  $V_i^{\pi^*}$  only depends on the rewards of state-action pairs chosen by  $\pi^*$ , we have

$$\begin{aligned}
\left| V_i^{\pi^*}(s \mid \delta_i) - V_i^{\pi^*}(s \mid \widehat{\delta}_i) \right| &= \left| \mathbb{E} \left[ \sum_{t=0}^{\infty} (\gamma_i)^t \cdot \left( \delta_i(s_t, \pi^*(s_t)) - \widehat{\delta}_i(s_t, \pi^*(s_t)) \right) \mid s_0 \sim \mathbf{z}, \pi^* \right] \right| \\
&= \left| \mathbb{E} \left[ \sum_{t=0}^{\infty} (\gamma_i)^t \cdot \widehat{\delta}_i(s_t, \pi^*(s_t)) \mid s_0 \sim \mathbf{z}, \pi^* \right] \right| \\
&\leq \left| \sum_{t=0}^{\infty} (\gamma_i)^t \cdot C_i \right| \\
&= \frac{1}{1 - \gamma_i} \cdot C_i.
\end{aligned} \tag{22}$$

Now compare the Q-values. We have

$$\begin{aligned}
Q_i^{\pi^*}(s, \pi^*(s) \mid \delta_i) - Q_i^{\pi^*}(s, \pi^*(s) \mid \widehat{\delta}_i) &= \delta_i(s, \pi^*(s)) - \widehat{\delta}_i(s, \pi^*(s)) + \gamma_i \cdot \mathbb{E}_{x \sim P(s, \pi^*(s), \cdot)} \left( V_i^{\pi^*}(x \mid \delta_i) - V_i^{\pi^*}(x \mid \widehat{\delta}_i) \right) \\
&\geq -C_i - \frac{\gamma_i}{1 - \gamma_i} \cdot C_i \quad (\text{by (22)}) \\
&= -\frac{1}{1 - \gamma_i} \cdot C_i.
\end{aligned}$$

Whereas for any  $a \neq \pi^*(s)$ ,

$$\begin{aligned}
Q_i^{\pi^*}(s, a \mid \delta_i) - Q_i^{\pi^*}(s, a \mid \widehat{\delta}_i) &= \delta_i(s, a) - \widehat{\delta}_i(s, a) + \gamma_i \cdot \mathbb{E}_{x \sim P(s, a, \cdot)} \left( V_i^{\pi^*}(x \mid \delta_i) - V_i^{\pi^*}(x \mid \widehat{\delta}_i) \right) \\
&\leq \delta_i(s, a) - \widehat{\delta}_i(s, a) + \frac{\gamma_i}{1 - \gamma_i} \cdot C_i \quad (\text{by (22)}) \\
&\leq -\frac{2}{1 - \gamma_i} \cdot C_i + C_i + \frac{\gamma_i}{1 - \gamma_i} \cdot C_i \quad (\text{by (20) and } \|\widehat{\delta}_i\| = C_i) \\
&= -\frac{1}{1 - \gamma_i} \cdot C_i
\end{aligned}$$

Combining the above two equations gives

$$Q_i^{\pi^*}(s, \pi^*(s) \mid \delta_i) - Q_i^{\pi^*}(s, a \mid \delta_i) \geq Q_i^{\pi^*}(s, \pi^*(s) \mid \widehat{\delta}_i) - Q_i^{\pi^*}(s, a \mid \widehat{\delta}_i)$$

for any  $s \in S$  and  $a \neq \pi^*(s)$ . Indeed, since  $\widehat{\delta}$  is feasible, by definition we have

$$Q_i^{\pi^*}(s, \pi^*(s) \mid \widehat{\delta}_i) \geq Q_i^{\pi^*}(s, a \mid \widehat{\delta}_i) + \epsilon$$

if  $a \neq \pi^*(s)$ . It then follows that

$$Q_i^{\pi^*}(s, \pi^*(s) \mid \delta_i) - Q_i^{\pi^*}(s, a \mid \delta_i) \geq \epsilon$$

for all  $a \neq \pi^*(s)$ . Since the choice of  $i$  is arbitrary, by definition  $\delta$  is feasible.

**Fairness** Indeed, since  $\delta$  offers no additional reward for state-action pairs specified by the target policy  $\pi^*$ , we have  $\rho_i^{\pi^*}(\delta_i) = \rho_i^{\pi^*}(0) = \rho_i^{\pi^*}(\delta_j)$  for all  $i, j \in [n]$ . Hence,  $\delta$  is WEF.  $\square$

## B.2 PoEF and PoSEF

Next we turn to PoEF and PoSEF.

**Lemma B.3.**  $\text{PoEF}(n, m, \lambda) = \Omega(\lambda \cdot n \cdot \sqrt{m})$ .

*Proof.* We use the class of instances illustrated in Figure 3. Similarly to the two-agent version of the instances we used in the proof of Lemma B.1, the cost of teaching  $\pi^*$  without fairness constraints is at most 1. It suffices to set  $\delta_1(s_*, c) = 1$  for agent 1, and keep the reward functions of all other agents as is since  $\pi^*$  is already optimal for agents 2,  $\dots$ ,  $n$  up to robustness  $\epsilon$ .

Now consider the case with fairness constraints. Suppose that  $\delta = (\delta_1, \dots, \delta_n)$  is an EF and feasible adjustment scheme, and without loss of generality  $\delta_2 = \dots = \delta_n$ . We argue that  $\sum_{i \in [n]} \|\delta_i\| = \Omega(\lambda \cdot n \cdot \sqrt{|S| \cdot |A|})$  to complete the proof.

Similarly to the argument in the proof of Lemma B.1, by symmetry we can assume without loss of generality that each  $\delta_i$  assigns the same reward for a state-action pair and its copy, so we omit the state in the notation of  $\delta_i$  and write, e.g.,  $\delta_i(a) = \delta_i(s_l, a)$ , as each action is associated with a unique state that is not a copy.

Consider the following two cases<sup>3</sup>:

**Case 1:**  $\delta_2(c) \geq 1/2$ . Since  $\delta_2$  incentivizes agent 2 to use the target policy  $\pi^*$ , we have  $Q_2^{\pi^*}(s_l, a) \geq Q_2^{\pi^*}(s_l, b) + \epsilon$ , or equivalently,

$$\delta_2(a) + \epsilon \geq \delta_2(b) + \frac{\gamma}{1-\gamma} \cdot \delta_2(c) + \epsilon.$$

Rearranging the terms gives

$$\delta_2(a) - \delta_2(b) \geq \frac{\gamma}{1-\gamma} \cdot \delta_2(c) \geq \frac{1}{2} \cdot \frac{\gamma}{1-\gamma}.$$

For any real numbers  $x$  and  $y$ , we have  $x^2 + y^2 \geq \frac{(x-y)^2}{2}$ . Hence,

$$\begin{aligned} \|\delta_2\| &\geq \sqrt{L} \cdot \sqrt{\delta_2^2(a) + \delta_2^2(b)} \geq \sqrt{L} \cdot \sqrt{\frac{(\delta_2(a) - \delta_2(b))^2}{2}} \\ &\geq \sqrt{L} \cdot \frac{1}{\sqrt{8}} \cdot \frac{\gamma}{1-\gamma} = \Omega(\lambda \cdot \sqrt{|S| \cdot |A|}). \end{aligned}$$

**Case 2:**  $\delta_2(c) \leq 1/2$ . By EF, we have  $\rho_1^{\pi^*}(\delta_1) \geq \rho_1^{\pi^*}(\delta_2)$  and  $\rho_2^{\pi^*}(\delta_2) \geq \rho_2^{\pi^*}(\delta_1)$ . The same as the proof of Lemma B.1 since the agents have the same discount factor, we have  $\rho_1^{\pi^*}(\delta_1) - \rho_1^{\pi^*}(0) = \rho_2^{\pi^*}(\delta_2) - \rho_1^{\pi^*}(0)$ , expanding which gives the following equation (the same as (19)).

$$\delta_1(a) + \left( \delta_1(d) + \frac{\gamma}{1-\gamma} \cdot \delta_1(c) \right) = \delta_2(a) + \left( \delta_2(d) + \frac{\gamma}{1-\gamma} \cdot \delta_2(c) \right). \quad (23)$$

Now by EF, agent 1 would not be better off if they were given  $\delta_2$  and deviated to a policy  $\pi$  with  $\pi(s_l) = a$  and  $\pi(s_r) = e$ . Namely,  $\rho_1^{\pi^*}(\delta_1) \geq \rho_1^{\pi^*}(\delta_2)$ , or equivalently

$$\delta_1(a) + \delta_1(d) + \frac{\gamma}{1-\gamma} \cdot (\delta_1(c) - 1) \geq \delta_2(a) + \delta_2(e).$$

Combining (23) with the above equation gives

$$\delta_2(d) - \delta_2(e) \geq \frac{\gamma}{1-\gamma} \cdot (1 - \delta_2(c)) \geq \frac{1}{2} \cdot \frac{\gamma}{1-\gamma}.$$

For any real numbers  $x$  and  $y$ , we have  $x^2 + y^2 \geq \frac{(x-y)^2}{2}$ . It follows that

$$\begin{aligned} \|\delta_2\| &\geq \sqrt{L} \cdot \sqrt{\delta_2^2(d) + \delta_2^2(e)} \\ &\geq \sqrt{L} \cdot \frac{1}{\sqrt{8}} \cdot \frac{\gamma}{1-\gamma} = \Omega(\lambda \cdot \sqrt{|S| \cdot |A|}). \end{aligned}$$

<sup>3</sup>The analysis of these two cases are similar to the analysis in the proof of Lemma B.1 but with a few differences. In particular, we focus on the adjustment for agent 2 in this proof and aim to show that  $\|\delta_2\| = \Omega(\lambda \cdot \sqrt{|S| \cdot |A|})$  for both cases, whereas when WEF is considered we can only bound  $\|\delta_1\|$  or  $\|\delta_1\| + \|\delta_2\|$  in the proof of Lemma B.1

Therefore, in both cases, we have  $\|\delta_2\| = \Omega(\lambda \cdot \sqrt{|S| \cdot |A|})$ . Since  $\delta_2 = \delta_3 = \dots = \delta_n$ , we have

$$\text{cost}(\delta) \geq \sum_{i=2}^n \|\delta_i\| = \Omega(\lambda \cdot n \cdot \sqrt{|S| \cdot |A|}),$$

which completes the proof.  $\square$

**Lemma B.4.**  $\text{PoSEF}(n, m, \lambda) = O(\lambda \cdot n \cdot \sqrt{m})$ .

*Proof.* The proof is similar to the proof of Lemma B.2. We penalize actions off the policy and let

$$\delta_i(s, a) = \begin{cases} 0, & \text{if } a = \pi^*(s) \\ -\max_{j \in [n]} \frac{3}{1-\gamma_j} \cdot C_j, & \text{otherwise} \end{cases}$$

for all  $s \in S$  and  $i \in [n]$ . Hence,  $\delta$  is SEF as all  $\delta_i$ 's are the same.

Similarly to (21), with this adjustment scheme  $\delta$ , we now have

$$\frac{\|\delta_i\|}{\max_{j \in [n]} \|\hat{\delta}_j\|} = \frac{\sqrt{\sum_{s \in S, a \in A} (\delta_i(s, a))^2}}{\max_{j \in [n]} C_j} \leq 3\lambda \cdot \sqrt{|S| \cdot |A|}.$$

Hence, the price of using  $\delta$  is

$$\frac{\sum_{i \in [n]} \|\delta_i\|}{\sum_{i \in [n]} \|\hat{\delta}_i\|} \leq \frac{\sum_{i \in [n]} \|\delta_i\|}{\max_{i \in [n]} \|\hat{\delta}_i\|} \leq n \cdot 3\lambda \cdot \sqrt{|S| \cdot |A|} = O(\lambda \cdot n \cdot \sqrt{m}).$$

The feasibility of  $\delta$  follows by the same argument in the proof of Lemma B.2.  $\square$

Summarizing the above lemmas, we get the following main theorem.

**Theorem 6.1.**  $\text{PoWEF}(n, m, \lambda) = \Theta(\lambda \cdot \sqrt{m})$ ,  $\text{PoEF}(n, m, \lambda) = \Theta(\lambda \cdot n \cdot \sqrt{m})$ , and  $\text{PoSEF}(n, m, \lambda) = \Theta(\lambda \cdot n \cdot \sqrt{m})$ .

*Proof.* The bound of the PoWEF follows by the lower and upper bounds established in Lemmas B.1 and B.2.

Since SEF is a stronger requirement than EF, the bounds of the PoEF and PoSEF follow by Lemmas B.3 and B.4.  $\square$

## C PoF Bounds with Non-negativity

Since a feasible and fair solution may not exist with non-negative adjustments, we analyze the case where the agents have the same discount factor. The existence of a feasible fair solution is guaranteed in this case according to Theorem 4.3.

### C.1 PoWEF

**Lemma C.1.**  $\text{PoWEF}(n, m, \lambda) = \Omega(\lambda \cdot n \cdot \sqrt{m})$  when the scheme is required to be non-negative and all the agents have the same discount factor.

*Proof.* Consider the family of instances illustrated in Figure 4. We show that the PoWEF of this particular family of instances is  $\Omega(\lambda \cdot n \cdot \sqrt{m})$  to establish the lower bound.

First, the cost of teaching  $\pi^*$  without fairness constraints is at most 1: the target policy  $\pi^*$  is already optimal for agent 2, and it suffices to set  $\delta_1(s_r, c) = 1$  to incentivize agent 1.

Now consider the case with fairness constraints and suppose that  $\delta = (\delta_1, \dots, \delta_n)$  is a WEF and feasible adjustment scheme. Without loss of generality, we can assume that  $\delta_2 = \delta_3 = \dots = \delta_n$ , and we argue that  $\|\delta_2\| = \Omega(\lambda \cdot \sqrt{m})$  to finish the proof.

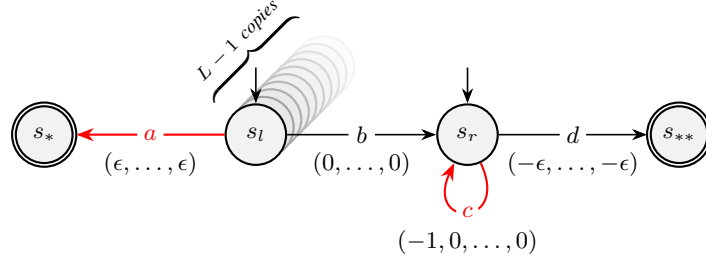

Figure 4: There are  $n$  agents, all with discount factor  $\gamma$ .  $A = \{a, b, c, d\}$  and all transitions are deterministic. The initial rewards are annotated on the corresponding edges, and they are identical for agents  $2, \dots, n$ . There are  $L - 1$  copies of  $s_l$ , each connected to  $s_*$  and  $s_r$  the same way  $s_l$  is connected to these two states (and with the same initial rewards). The initial state distribution has probability  $0.5/L$  on  $s_l$  as well as each of its copies, and  $0.5$  on  $s_r$ . The target policy is highlighted in red:  $\pi^*(s) = a$  for  $s = s_l$  and its copies, and  $\pi^*(s_r) = c$ .

By symmetry, we can assume without loss of generality that each  $\delta_i$  assigns the same reward for a state-action pair and its copies in the instance. Hence, it suffices to consider only the values associated with the original state-action pairs, and we omit the state in the notation and write, e.g.,  $\delta_i(a) = \delta_i(s_l, a)$ , as each action is associated with a unique state.

Consider the following two cases.

**Case 1:**  $\delta_2(c) \geq 1/2$ . Since  $\delta_2$  incentivizes agent 2 to use the target policy  $\pi^*$ , we have  $Q_2^{\pi^*}(s_l, a) \geq Q_2^{\pi^*}(s_l, b) + \epsilon$ , or equivalently,

$$\delta_2(a) + \epsilon \geq \delta_2(b) + \frac{\gamma}{1-\gamma} \cdot \delta_2(c) + \epsilon.$$

Since  $\delta_2$  is non-negative and by assumption  $\delta_2(c) \geq 1/2$  in this case, we get that  $\delta_2(a) \geq \frac{1}{2} \cdot \frac{\gamma}{1-\gamma}$ . By symmetry this also holds for all copies of action  $a$ . It follows that

$$\|\delta_2\| \geq \frac{\sqrt{L}}{2} \cdot \frac{\gamma}{1-\gamma} = \Omega(\lambda\sqrt{m}).$$

**Case 2:**  $\delta_2(c) \leq 1/2$ . Note that since  $\delta_1$  is non-negative and it incentivizes agent 1 to select action  $c$ , it must be that  $\delta_1(c) \geq 1$ . By WEF, we have  $\rho_2^{\pi^*}(\delta_2) \geq \rho_2^{\pi^*}(\delta_1)$ , which means

$$0.5 \cdot (\epsilon + \delta_2(a)) + 0.5 \cdot \frac{1}{1-\gamma} \cdot \delta_2(c) \geq 0.5 \cdot (\epsilon + \delta_1(a)) + 0.5 \cdot \frac{1}{1-\gamma} \cdot \delta_1(c).$$

Rearranging the terms and using the facts that  $\delta_1(c) \geq 1$  and all adjustments are non-negative, we get that  $\delta(a) \geq \frac{1}{2} \cdot \frac{1}{1-\gamma}$  and

$$\|\delta_2\| \geq \frac{\sqrt{L}}{2} \cdot \frac{1}{1-\gamma} = \Omega(\lambda\sqrt{m}).$$

Therefore, in both cases,  $\|\delta_2\| = \Omega(\lambda \cdot \sqrt{m})$ . Since  $\delta_2 = \delta_3 = \dots = \delta_n$ , we have  $\text{cost}(\delta) \geq \sum_{i=2}^n \|\delta_i\| = \Omega(\lambda \cdot n \cdot \sqrt{m})$ , which completes the proof.  $\square$

**Lemma C.2.**  $\text{PoWEF}(n, m, \lambda) = O(\lambda \cdot n \cdot \sqrt{m})$  when the scheme is required to be non-negative and all the agents have the same discount factor.

*Proof.* Suppose that without the fairness constraints the minimum costs for teaching  $\pi^*$  is  $C_i$  for each agent  $i \in [n]$ ; let  $\hat{\delta}_i$  be the adjustment achieving this minimum cost for each  $i \in [n]$ , and let  $\hat{\delta} = (\hat{\delta}_i)_{i \in [n]}$ . Hence,  $|\hat{\delta}_i(s, x)| \leq \|\hat{\delta}_i\| = C_i$  for all  $i, s$ , and  $x$ .

Note that since the agents have the same discount factor, the improvement  $\varrho^{\pi^*}$  of the cumulative reward is the same for all  $i \in [n]$ :

$$\varrho^{\pi^*}(\hat{\delta}_j) := \rho_i^{\pi^*}(\hat{\delta}_j) - \rho_i^{\pi^*}(0).$$

For each  $i \in [n]$ , we let

$$H_i = (1 - \gamma) \cdot \left( \max_{j \in [n]} \varrho^{\pi^*}(\hat{\delta}_j) - \varrho^{\pi^*}(\hat{\delta}_i) \right).$$

Then we construct the following adjustment scheme  $\delta = (\delta_i)_{i \in [n]}$ :

$$\delta_i(s, a) = \begin{cases} \hat{\delta}_i(s, a) + H_i + \frac{\gamma}{1-\gamma} \cdot H_i \cdot \sum_{s' \in S^T} P(s, a, s'), & \text{if } a = \pi^*(s) \\ 0, & \text{otherwise} \end{cases} \quad (24)$$

For any  $s$  and  $a$ , we have

$$\begin{aligned} \delta_i(s, a) &\leq \hat{\delta}_i(s, a) + \frac{1}{1-\gamma} \cdot H_i \\ &\leq \hat{\delta}_i(s, a) + \max_{j \in [n]} \varrho_i^{\pi^*}(\hat{\delta}_j) \leq \frac{2}{1-\gamma} \cdot \max_{j \in [n]} C_j, \end{aligned}$$

where we use  $\hat{\delta}_i(s, a) \leq \max_{j \in [n]} C_j$  and  $\varrho_i^{\pi^*}(\hat{\delta}_j) \leq \frac{1}{1-\gamma} \cdot C_j$ , and the latter is due to the fact that the agent gets an additional reward of at most  $C_j$  at each time step when  $\hat{\delta}_j$  is applied. It follows that the price of using  $\delta$  is

$$\frac{\text{cost}(\delta)}{\text{cost}(\hat{\delta})} \leq \frac{\sum_{i \in [n]} \|\delta_i\|}{\max_{i \in [n]} \|\hat{\delta}_i\|} \leq \frac{n \cdot 2\lambda \cdot \max_{i \in [n]} C_i \cdot \sqrt{|S| \cdot |A|}}{\max_{i \in [n]} C_i} = O(\lambda \cdot n \cdot \sqrt{m}).$$

Therefore, it remains to argue that  $\delta$  is feasible and WEF.

Now that non-negativity is imposed, we can assume without loss of generality that  $\hat{\delta}_i(s, a) = 0$  for all  $s \in S$  and  $a \neq \pi^*(s)$ . Therefore, the way  $\delta$  is defined in (24) is equivalent to adding an additional reward  $H_i$  to agent  $i$  on top of what is already offered by  $\hat{\delta}_i$ . The term  $\frac{\gamma}{1-\gamma} \cdot H_i \cdot \sum_{s' \in S^T} P(s, a, s')$  adjusts the reward in consideration of subsequent terminal states, so that it is as if the process continues forever with an additional  $H_i$  offered at every subsequent step. Consequently, this improves the V-value of every non-terminal state by  $\frac{1}{1-\gamma} \cdot H_i$ , i.e., for every  $s \in S \setminus S^T$  and every pair  $i, j \in [n]$  we have

$$V_i^{\pi^*}(s \mid \delta_j) = V_i^{\pi^*}(s \mid \hat{\delta}_j) + \frac{1}{1-\gamma} \cdot H_i. \quad (25)$$

**Feasibility** Since the V-values of all non-terminal states increase by the same amount,  $\delta$  remains feasible. Specifically, since  $\hat{\delta}$  is feasible, we have

$$Q_i^{\pi^*}(s, \pi^*(s) \mid \hat{\delta}_i) \geq Q_i^{\pi^*}(s, a \mid \hat{\delta}_i) + \epsilon$$

for all  $s$  and  $a \neq \pi^*(s)$ . Now compare  $\delta$  and  $\hat{\delta}$ . We have

$$\begin{aligned} &Q_i^{\pi^*}(s, \pi^*(s) \mid \delta_i) - Q_i^{\pi^*}(s, \pi^*(s) \mid \hat{\delta}_i) \\ &= \delta_i(s, \pi^*(s)) - \hat{\delta}_i(s, \pi^*(s)) + \gamma \cdot \mathbb{E}_{x \sim P(s, \pi^*(s), \cdot)} \left( V_i^{\pi^*}(x \mid \delta_i) - V_i^{\pi^*}(x \mid \hat{\delta}_i) \right) \\ &= \delta_i(s, \pi^*(s)) - \hat{\delta}_i(s, \pi^*(s)) + \gamma \cdot \sum_{x \in S \setminus S^T} P(s, \pi^*(s), x) \cdot \left( V_i^{\pi^*}(x \mid \delta_i) - V_i^{\pi^*}(x \mid \hat{\delta}_i) \right) \\ &\quad + \gamma \cdot \sum_{x \in S^T} P(s, \pi^*(s), x) \cdot \left( V_i^{\pi^*}(x \mid \delta_i) - V_i^{\pi^*}(x \mid \hat{\delta}_i) \right) \\ &= H_i + \gamma \cdot \sum_{x \in S \setminus S^T} P(s, \pi^*(s), x) \cdot \left( V_i^{\pi^*}(x \mid \delta_i) - V_i^{\pi^*}(x \mid \hat{\delta}_i) \right) \\ &\quad + \gamma \cdot \sum_{x \in S^T} P(s, \pi^*(s), x) \cdot \left( \frac{1}{1-\gamma} \cdot H_i + V_i^{\pi^*}(x \mid \delta_i) - V_i^{\pi^*}(x \mid \hat{\delta}_i) \right), \end{aligned}$$

Using (25) and the fact that the V-values of all the terminal states are zero, we further get that

$$\begin{aligned}
& Q_i^{\pi^*}(s, \pi^*(s) | \delta_i) - Q_i^{\pi^*}(s, \pi^*(s) | \hat{\delta}_i) \\
&= H_i + \gamma \cdot \sum_{x \in S \setminus S^T} P(s, \pi^*(s), x) \cdot \frac{1}{1-\gamma} \cdot H_i + \gamma \cdot \sum_{x \in S^T} P(s, \pi^*(s), x) \cdot \frac{1}{1-\gamma} \cdot H_i \\
&= \frac{1}{1-\gamma} \cdot H_i.
\end{aligned}$$

Next, consider actions  $a \neq \pi^*(s)$ . We have

$$\begin{aligned}
Q_i^{\pi^*}(s, a | \delta_i) - Q_i^{\pi^*}(s, a | \hat{\delta}_i) &= \delta_i(s, a) - \hat{\delta}_i(s, a) + \gamma \cdot \mathbb{E}_{x \sim P(s, a, \cdot)} \left( V_i^{\pi^*}(x | \delta_i) - V_i^{\pi^*}(x | \hat{\delta}_i) \right) \\
&\leq \gamma \cdot \mathbb{E}_{x \sim P(s, a, \cdot)} \left( V_i^{\pi^*}(x | \delta_i) - V_i^{\pi^*}(x | \hat{\delta}_i) \right) \\
&\leq \frac{\gamma}{1-\gamma} \cdot H_i.
\end{aligned}$$

It follows that

$$Q_i^{\pi^*}(s, \pi^*(s) | \delta_i) - Q_i^{\pi^*}(s, a | \delta_i) \geq Q_i^{\pi^*}(s, \pi^*(s) | \hat{\delta}_i) - Q_i^{\pi^*}(s, a | \hat{\delta}_i) \geq \epsilon$$

for any  $s \in S$  and  $a \neq \pi^*(s)$ . Since the choice of  $i$  is arbitrary,  $\delta$  is feasible.

**Fairness** By definition  $\rho_i^{\pi^*}(\delta_j) = V_i^{\pi^*}(\mathbf{z} | \delta_j)$ , where  $\mathbf{z}$  is the initial state distribution. Using (25), we then get that

$$\begin{aligned}
\rho_i^{\pi^*}(\delta_j) &= \rho_i^{\pi^*}(\hat{\delta}_j) + \frac{1}{1-\gamma} \cdot H_i \\
&= \rho_i^{\pi^*}(\hat{\delta}_j) + \max_{i' \in [n]} \varrho^{\pi^*}(\hat{\delta}_{i'}) - \varrho^{\pi^*}(\hat{\delta}_i) \\
&\leq \rho_i^{\pi^*}(\hat{\delta}_i) + \max_{i' \in [n]} \varrho^{\pi^*}(\hat{\delta}_{i'}) - \varrho^{\pi^*}(\hat{\delta}_i) \quad (\text{as } \hat{\delta} \text{ is WEF}) \\
&= \rho_i^{\pi^*}(0) + \max_{i' \in [n]} \varrho^{\pi^*}(\hat{\delta}_{i'})
\end{aligned}$$

for all  $i, j \in [n]$ . The right side does not depend on  $j$ , which means  $\rho_i^{\pi^*}(\delta_i) = \rho_i^{\pi^*}(\delta_j)$ , for all  $j$ , so  $\delta$  is WEF.  $\square$

## C.2 PoEF and PoSEF

**Lemma C.3.**  $\text{PoEF}(n, m, \lambda) = \Omega(\lambda^2 \cdot n \cdot \sqrt{m})$  when the scheme is required to be non-negative and all the agents have the same discount factor.

*Proof.* Consider the family of instances illustrated in Figure 5. We show that the PoEF of this particular family of instances is  $\Omega(\lambda^2 \cdot n \cdot \sqrt{m})$  to establish the lower bound.

First, the cost of teaching  $\pi^*$  without fairness constraints is at most 2: the target policy  $\pi^*$  is already optimal for agents  $3, \dots, n$ , and it suffices to set  $\delta_1(s_l, c) = 1$  to incentivize agent 1.

Now consider the case with fairness constraints and suppose that  $\delta = (\delta_1, \dots, \delta_n)$  is EF and feasible. Without loss of generality, we can assume that  $\delta_3 = \dots = \delta_n$ , and we argue that  $\|\delta_2\| = \Omega(\lambda^2 \cdot n \cdot \sqrt{m})$  to finish the proof.

By symmetry, we can assume without loss of generality that each  $\delta_i$  assigns the same reward for a state-action pair and its copies in the instance. Hence, it suffices to consider only the values associated with the original state-action pairs, and we omit the state in the notation and write, e.g.,  $\delta_i(a) = \delta_i(s_l, a)$ , as each action is associated with a unique state.

Observe that the structure of the MDP is symmetric with respect to agents 1 and 2. Hence, without loss of generality, we can also assume the same symmetry in  $\delta$ :

$$\delta_1(a) = \delta_2(h), \quad \delta_1(h) = \delta_2(a), \quad \delta_1(c) = \delta_2(f), \quad \text{and } \delta_1(f) = \delta_2(c). \quad (26)$$

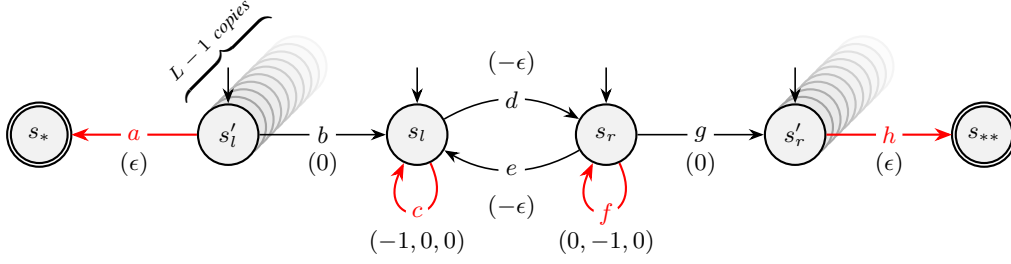

Figure 5: There are  $n$  agents, all with discount factor  $\gamma$ .  $A = \{a, b, c, \dots, h\}$  and all transitions are deterministic. The initial rewards of agents 1, 2, and 3 are annotated on the corresponding edges (if there is only one number, then all the agents have the same reward). Agents 4,  $\dots$ ,  $n$  have the same reward function as agent 3. There are  $L - 1$  copies of  $s'_l$  and  $s'_r$ , each connected to the other states the same way  $s_l$  and  $s_r$  are connected (and with the same initial rewards). The initial state distribution has probability  $0.25/L$  on each of  $s'_l$  and  $s'_r$  as well as each of their copies, and  $0.25$  on each of  $s_l$  and  $s_r$ . The target policy is highlighted in red:  $\pi^*(s'_l) = a$ ,  $\pi^*(s_l) = c$ ,  $\pi^*(s_r) = f$ , and  $\pi^*(s'_r) = h$  (and the same for the corresponding copies).

Next, we first show that  $\delta_1(c) \geq \frac{1}{1-\gamma} - \epsilon$  and  $\delta_1(f) \geq \frac{1}{1-\gamma} - \epsilon$ . Since  $\delta$  incentivizes agent 1 to take action  $c$  instead of  $d$ , we have  $Q_1^{\pi^*}(s_l, c | \delta_1) \geq Q_1^{\pi^*}(s_l, d | \delta_1) + \epsilon$ , expanding which gives

$$\frac{1}{1-\gamma} \cdot (\delta_1(c) - 1) \geq -\epsilon + \frac{\gamma}{1-\gamma} \cdot \delta_1(f) + \epsilon,$$

or

$$\delta_1(c) \geq \gamma \cdot \delta_1(f) + 1. \quad (27)$$

Since  $\delta$  is EF, agent 1 cannot be better off with the following policy  $\pi$  and  $\delta_2$ :  $\pi(s_l) = d$  and  $\pi(s) = \pi^*(s)$  for all other  $s$ . Namely,  $\rho_1^\pi(\delta_2) \leq \rho_1^{\pi^*}(\delta_1)$ , or

$$\begin{aligned} & (\delta_2(a) + \epsilon) \quad \overbrace{-\epsilon + \frac{\gamma}{1-\gamma} \cdot \delta_2(f)}^{V_1^\pi(s_l | \delta_2)} \quad + \frac{1}{1-\gamma} \cdot \delta_2(f) \quad + (\delta_2(h) + \epsilon) \\ & \leq (\delta_1(a) + \epsilon) \quad + \frac{1}{1-\gamma} \cdot (\delta_1(c) - 1) \quad + \frac{1}{1-\gamma} \cdot \delta_1(f) \quad + (\delta_1(h) + \epsilon), \end{aligned}$$

where we omit the initial probability  $0.25$  as the coefficients on both sides of the equation. Applying (26), we can reduce the above equation to

$$1 + \gamma \cdot \delta_1(c) - (1 - \gamma) \cdot \epsilon \leq \delta_1(f).$$

Combining (27) with the above equation gives

$$\begin{aligned} & \delta_1(f) \geq \gamma^2 \cdot \delta_1(f) + \gamma + 1 - (1 - \gamma) \cdot \epsilon, \\ \implies & \delta_1(f) \geq \frac{1}{1-\gamma} - \frac{\epsilon}{1+\gamma} \geq \frac{1}{1-\gamma} - \epsilon; \\ \text{and} & \delta_1(c) \geq \gamma \cdot \delta_1(f) + 1 \geq \frac{1}{1-\gamma} - \epsilon. \end{aligned}$$

The remainder of the proof is then similar to the proof of Lemma C.1 (where we had  $\delta_1(c) \geq 1$  but now  $\delta_1(c) \geq \frac{1}{1-\gamma} - \epsilon$ ). We analyze the following three cases.

**Case 1:**  $\delta_3(c) \geq \lambda/2$ . Since  $\delta_3$  incentivizes agent 3 to use the target policy  $\pi^*$ , we have  $Q_3^{\pi^*}(s'_l, a) \geq Q_3^{\pi^*}(s'_l, b) + \epsilon$ , or equivalently,

$$\delta_3(a) + \epsilon \geq \delta_3(b) + \frac{\gamma}{1-\gamma} \cdot \delta_3(c) + \epsilon.$$

Since  $\delta_3$  is non-negative and by assumption  $\delta_3(c) \geq \lambda/2$  in this case, we get that  $\delta_3(a) \geq \frac{\lambda}{2} \cdot \frac{\gamma}{1-\gamma}$ . By symmetry this also holds for all copies of action  $a$ . It follows that

$$\|\delta_3\| \geq \sqrt{L} \cdot \frac{\lambda}{2} \cdot \frac{\gamma}{1-\gamma} = \Omega(\lambda^2 \sqrt{m}).$$

**Case 2:**  $\delta_3(f) \geq \lambda/2$ . Applying the same arguments for Case 1 gives  $\|\delta_3\| = \Omega(\lambda^2 \sqrt{m})$  in this case.

**Case 3:**  $\delta_3(c) \leq \lambda/2$  and  $\delta_3(f) \leq \lambda/2$ . We have shown that  $\delta_1(c) \geq \frac{1}{1-\gamma} - \epsilon$  and  $\delta_1(f) \geq \frac{1}{1-\gamma} - \epsilon$ . By WEF, we have  $\rho_3^{\pi^*}(\delta_3) \geq \rho_3^{\pi^*}(\delta_1)$ , which means

$$\begin{aligned} & (\delta_3(a) + \epsilon) + \frac{1}{1-\gamma} \cdot \delta_3(c) + \frac{1}{1-\gamma} \cdot \delta_3(f) + (\delta_3(h) + \epsilon) \\ & \geq (\delta_1(a) + \epsilon) + \frac{1}{1-\gamma} \cdot \delta_1(c) + \frac{1}{1-\gamma} \cdot \delta_1(f) + (\delta_1(h) + \epsilon). \end{aligned}$$

Rearranging the terms and using non-negativity and the facts that  $\delta_1(c) \geq \frac{1}{1-\gamma} - \epsilon$  and  $\delta_1(f) \geq \frac{1}{1-\gamma} - \epsilon$ , as well as the assumption that  $\delta_3(c) \leq \lambda/2$  and  $\delta_3(f) \leq \lambda/2$  in this case, we get that

$$\delta_3(a) + \delta_3(h) \geq \left( \frac{1}{1-\gamma} \right)^2 - \frac{2\epsilon}{1-\gamma} = \lambda^2 - 2\epsilon \cdot \lambda.$$

It follows that

$$\|\delta_3\| \geq \sqrt{\frac{L \cdot (\delta_3(a) + \delta_3(h))^2}{2}} = \Omega(\lambda^2 \sqrt{m}).$$

Therefore, in all cases,  $\|\delta_3\| = \Omega(\lambda^2 \cdot \sqrt{m})$ . Since  $\delta_3 = \dots = \delta_n$ , we have  $\text{cost}(\delta) \geq \sum_{i=3}^n \|\delta_i\| = \Omega(\lambda^2 \cdot n \cdot \sqrt{m})$ , which completes the proof.  $\square$

**Lemma C.4.**  $\text{PoSEF}(n, m, \lambda) = O(\lambda^2 \cdot n \cdot \sqrt{m})$  when the scheme is required to be non-negative and all the agents have the same discount factor.

*Proof.* Let  $\gamma_1 = \dots = \gamma_n = \gamma$ . Suppose that without the fairness constraints, the minimum costs for teaching  $\pi^*$  is  $C_i$  for each agent  $i \in [n]$ ; let  $\hat{\delta}_i$  be the adjustment achieving this minimum cost for each  $i \in [n]$ , and let  $\hat{\delta} = (\hat{\delta}_i)_{i \in [n]}$ . Since the schemes are non-negative, we have  $0 \leq \hat{\delta}_i(s, a) \leq C_i$  for all  $i, s$ , and  $a$ .

Now consider SEF and the following adjustment scheme (similar to (17)), where we let  $H = \frac{1}{1-\gamma} \max_{i \in [n]} C_i$  and  $S^T$  be the set of terminal states.

$$\delta_i(s, a) = \begin{cases} H + \frac{\gamma}{1-\gamma} \cdot H \cdot \sum_{s' \in S^T} P(s, a, s'), & \text{if } a = \pi^*(s) \\ 0, & \text{otherwise} \end{cases} \quad (28)$$

As defined above,  $\delta$  is non-negative, and  $\delta_i$  is identical for all  $i \in [n]$ , so  $\delta$  is SEF. Moreover, we have  $0 \leq \delta_i(s, a) \leq \frac{1}{1-\gamma} \cdot H$  for all  $i, s$ , and  $a$ . Hence,

$$\frac{\text{cost}(\delta)}{\text{cost}(\hat{\delta})} \leq \frac{\sum_{i \in [n]} \|\delta_i\|}{\max_{i \in [n]} \|\hat{\delta}_i\|} \leq \frac{n \cdot \lambda \cdot H \cdot \sqrt{|S| \cdot |A|}}{\max_{i \in [n]} C_i} = O(\lambda^2 \cdot n \cdot \sqrt{m}).$$

It remains to argue that  $\delta$  is also feasible.

Consider an arbitrary agent  $i$ . We first argue that

$$V_i^{\pi^*}(s | \delta_i) = V_i^{\pi^*}(s | 0) + \frac{1}{1-\gamma} \cdot H \quad (29)$$

for all  $s \in S \setminus S^T$ , where  $V_i^{\pi^*}(s | 0)$  denotes the original value function when no adjustment is provided. Indeed, since the  $V$ -function is additive for two reward functions, it suffices to argue that

in a process where the  $\delta_i$  is the reward function, the corresponding V-values are  $\frac{1}{1-\gamma} \cdot H$  for every  $s \in S \setminus S^T$ . This can be verified via the Bellman equation: The V-values are 0 for all the terminal states, whereas for the non-terminal states, the term  $\frac{\gamma}{1-\gamma} \cdot H \cdot \sum_{s' \in S^T} P(s, a, s')$  makes it as if the process continues forever with a reward  $H$  generated in every subsequent step, whereby the V-values are exactly  $\frac{1}{1-\gamma} \cdot H$ . Hence, (29) then follows.

Next consider  $\widehat{\delta}$ , we have

$$V_i^{\pi^*}(s \mid \widehat{\delta}_i) = V_i^{\pi^*}(s) + \mathbb{E} \left[ \sum_{t=0}^{\infty} (\gamma_i)^t \cdot \widehat{\delta}_i(s_t, \pi^*(s_t)) \mid s_0 \sim \mathbf{z}, \pi^* \right].$$

Hence,

$$V_i^{\pi^*}(s \mid 0) \leq V_i^{\pi^*}(s \mid \widehat{\delta}_i) \leq V_i^{\pi^*}(s \mid 0) + \frac{1}{1-\gamma} \cdot C, \quad (30)$$

where we let  $C = \max_{i \in [n]} C_i$ . The first inequality follows by the non-negativity of  $\widehat{\delta}$ , and the second follows by the fact that  $\widehat{\delta}_i(s, a) \leq C_i \leq C$  for all  $i, s$ , and  $a$ .

Compare the differences in the Q-values when  $\widehat{\delta}$  and  $\delta$  are applied. We have

$$\begin{aligned} & Q_i^{\pi^*}(s, \pi^*(s) \mid \delta_i) - Q_i^{\pi^*}(s, \pi^*(s) \mid \widehat{\delta}_i) \\ &= \delta_i(s, \pi^*(s)) - \widehat{\delta}_i(s, \pi^*(s)) + \gamma \cdot \mathbb{E}_{x \sim P(s, \pi^*(s), \cdot)} \left( V_i^{\pi^*}(x \mid \delta_i) - V_i^{\pi^*}(x \mid \widehat{\delta}_i) \right) \\ &= \delta_i(s, \pi^*(s)) - \widehat{\delta}_i(s, \pi^*(s)) + \gamma \cdot \sum_{x \in S \setminus S^T} P(s, \pi^*(s), x) \cdot \left( V_i^{\pi^*}(x \mid \delta_i) - V_i^{\pi^*}(x \mid \widehat{\delta}_i) \right) \\ &\quad + \gamma \cdot \sum_{x \in S^T} P(s, \pi^*(s), x) \cdot \left( V_i^{\pi^*}(x \mid \delta_i) - V_i^{\pi^*}(x \mid \widehat{\delta}_i) \right) \\ &= H - \widehat{\delta}_i(s, \pi^*(s)) + \gamma \cdot \sum_{x \in S \setminus S^T} P(s, \pi^*(s), x) \cdot \left( V_i^{\pi^*}(x \mid \delta_i) - V_i^{\pi^*}(x \mid \widehat{\delta}_i) \right) \\ &\quad + \gamma \cdot \sum_{x \in S^T} P(s, \pi^*(s), x) \cdot \left( \frac{1}{1-\gamma} \cdot H + V_i^{\pi^*}(x \mid \delta_i) - V_i^{\pi^*}(x \mid \widehat{\delta}_i) \right), \end{aligned}$$

where the last equality follows by replacing  $\delta_i(s, \pi^*(s))$  according to (28). Note that for all terminal states  $x \in S^T$ , we have  $V_i^{\pi^*}(x \mid \delta_i) = V_i^{\pi^*}(x \mid \widehat{\delta}_i) = 0$ . Moreover, using (29) and (30), we have  $V_i^{\pi^*}(x \mid \delta_i) - V_i^{\pi^*}(x \mid \widehat{\delta}_i) \geq \frac{1}{1-\gamma} \cdot (H - C)$ . Hence, the above equation continues as:

$$\begin{aligned} & Q_i^{\pi^*}(s, \pi^*(s) \mid \delta_i) - Q_i^{\pi^*}(s, \pi^*(s) \mid \widehat{\delta}_i) \\ &\geq H - \widehat{\delta}_i(s, \pi^*(s)) + \gamma \sum_{x \in S \setminus S^T} P(s, \pi^*(s), x) \cdot \frac{1}{1-\gamma} \cdot (H - C) + \gamma \sum_{x \in S^T} P(s, \pi^*(s), x) \cdot \frac{1}{1-\gamma} \cdot H \\ &\geq H - C + \frac{\gamma \cdot H}{1-\gamma} - \frac{\gamma \cdot C}{1-\gamma} \\ &\geq \frac{\gamma}{1-\gamma} \cdot H. \end{aligned}$$

Next, we consider actions  $a \neq \pi^*(s)$ .

$$\begin{aligned} Q_i^{\pi^*}(s, a \mid \delta_i) - Q_i^{\pi^*}(s, a \mid \widehat{\delta}_i) &= \delta_i(s, a) - \widehat{\delta}_i(s, a) + \gamma \cdot \mathbb{E}_{x \sim P(s, a, \cdot)} \left( V_i^{\pi^*}(x \mid \delta_i) - V_i^{\pi^*}(x \mid \widehat{\delta}_i) \right) \\ &\leq \gamma \cdot \mathbb{E}_{x \sim P(s, a, \cdot)} \left( V_i^{\pi^*}(x \mid \delta_i) - V_i^{\pi^*}(x \mid \widehat{\delta}_i) \right) \\ &\leq \frac{\gamma}{1-\gamma} \cdot H, \end{aligned}$$

where the last transition follows by (28) and (30).

Combining the above two equations gives

$$Q_i^{\pi^*}(s, \pi^*(s) | \delta_i) - Q_i^{\pi^*}(s, a | \delta_i) \geq Q_i^{\pi^*}(s, \pi^*(s) | \hat{\delta}_i) - Q_i^{\pi^*}(s, a | \hat{\delta}_i)$$

for any  $s \in S$  and  $a \neq \pi^*(s)$ . Indeed, since  $\hat{\delta}$  is feasible, by definition we have

$$Q_i^{\pi^*}(s, \pi^*(s) | \hat{\delta}_i) \geq Q_i^{\pi^*}(s, a | \hat{\delta}_i) + \epsilon.$$

It then follows that

$$Q_i^{\pi^*}(s, \pi^*(s) | \delta_i) - Q_i^{\pi^*}(s, a | \delta_i) \geq \epsilon$$

for all  $a \neq \pi^*(s)$ . Since the choice of  $i$  is arbitrary,  $\delta$  is feasible.  $\square$

Summarizing the above two lemmas, we get the following result.

**Theorem 6.2.** *When the scheme is required to be non-negative and all the agents have the same discount factor, it holds that  $\text{PoWEF}(n, m, \lambda) = \Theta(\lambda \cdot n \cdot \sqrt{m})$ ,  $\text{PoEF}(n, m, \lambda) = \Theta(\lambda^2 \cdot n \cdot \sqrt{m})$ , and  $\text{PoSEF}(n, m, \lambda) = \Theta(\lambda^2 \cdot n \cdot \sqrt{m})$ .*

*Proof.* Lemmas C.1 and C.2 establish the bound of the PoWEF.

Since SEF is a stronger requirement than EF, Lemmas C.3 and C.4 establish the bounds of the PoEF and PoSEF.  $\square$
